# Supplementary material
Source: PubMed Central journal article supplement (PMC4695238)
Supplement: NIHMS730563-supplement-1.pdf [file NIHMS730563-supplement-1.pdf]

# Family A

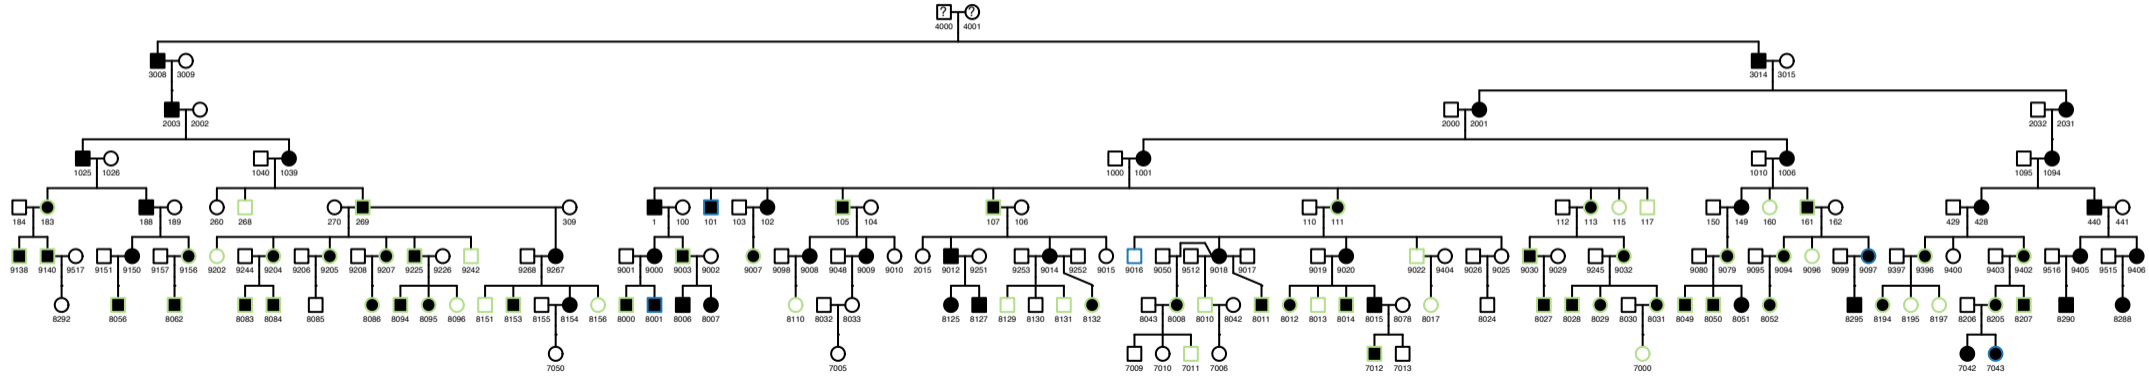

# Family B

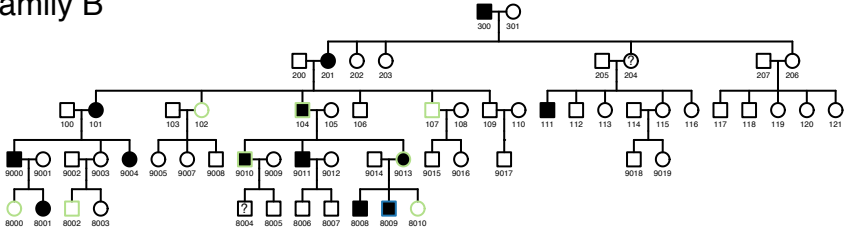

# Family C

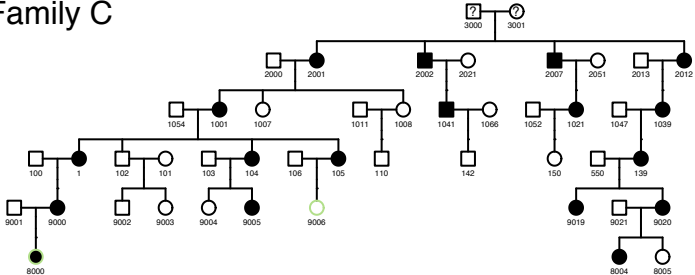

# Family D

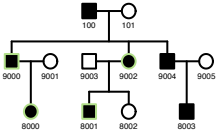

# Family E

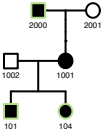

# Family F

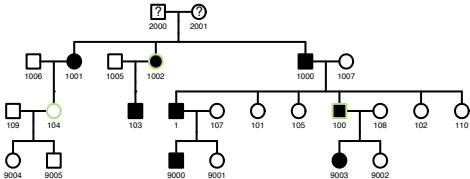

# Family G

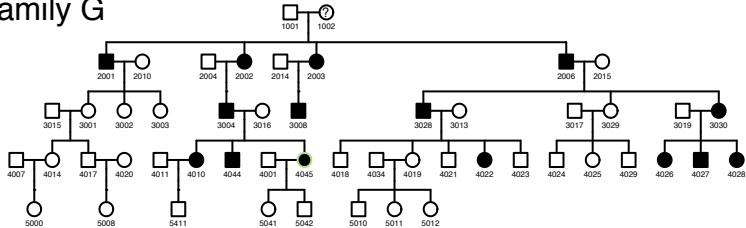

# Family H

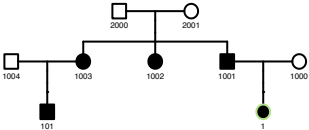



# Family I

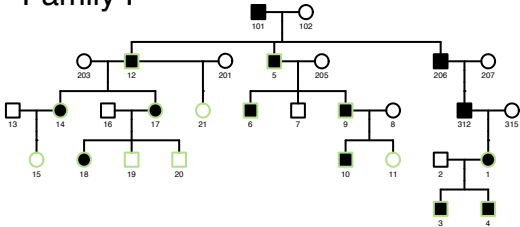

# Family J

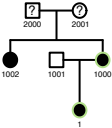

# Family K

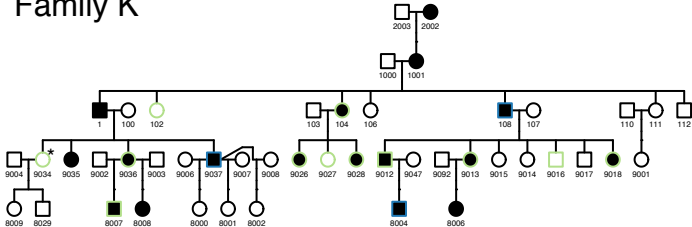

# Family L

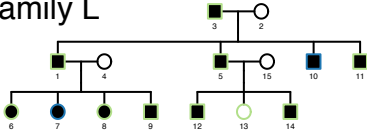

**Supplemental Figure 1:** Pedigrees of families included in this study. Individuals from whom DNA was available in sufficient quantity and quality are indicated in green, individuals who were studied using next-generation sequencing are indicated in blue. The individual marked with the asterisk in Family K harbored the interval defining recombination.
