# Supplementary material
Source: PubMed Central journal article supplement (PMC4695238)
Supplement: NIHMS730563-supplement-5.pdf [file NIHMS730563-supplement-5.pdf]

Supplemental Table 1 Oligonucleotide Primers

| Primer Name         | Type | Sequence Description     | Forward Sequence         | Reverse Sequence           |
|---------------------|------|--------------------------|--------------------------|----------------------------|
| PRDM13-DHS_1        | S    | chr6_100040343-100040606 | GCATTCCCTAAAGCACTTGACC   | GATAGCTACCCCTCCTCTGAATG    |
| PRDM13-DHS_2        | S    | chr6_100040524-100040879 | CTGATCATTGAATCAAGGCAG    | CAGCACTTGCACATTTGTGTC      |
| PRDM13-DHS_3*       | S    | chr6_100040803-100041001 | GAGAAGACTAGATCAGGCTTCTTC | CTCTCATTCTCTGATTTTTAC      |
| PRDM13-DHS_5        | S    | chr6_100041063-100041470 | CACTGGAAAAATTATGTGGAAATC | GAGTAATTAATGAAGTTGACAAGTTG |
| PRDM13_Duplication* | J    | chr6_Junction Fragment   | GATAAATCATATCTTAGACCGC   | CTCATGCCTATAATCCCAGCAC     |
| IRX1_Duplication*   | J    | chr5_Junction Fragment   | GTTTTACGAAAGTGCAAAGG     | GGGGTGAAGAGAAGAGAGG        |
| PRDM13              | R    | Exon 3 to Exon 4         | GGAGGAGCTGACAGTGTGGT     | AAACGTCCTCCAGCAGTACCAG     |
| IRX1                | R    | Exon 3 to Exon 4         | CAGCAGTTAAAGTCGCCCTT     | AAAAGTAAAAGAAGACCCTTAA     |
| CCNC                | R    | Exon 8 to Exon 9         | CTTGATAGTGTATCATCCTTATA  | TCATTCACTATCCTCCATGCAAGG   |
| PAX6                | R    | Exon 5 to Exon 7         | CCGGCAGAAGATTGTAGAGC     | GCCCGTTCAACATCCTTAGT       |
| RHO                 | R    | Exon 2 to Exon 5         | GGGAGAACCATGCCATCAT      | TCGTCTCCGTCTTGGACAC        |
| S-Opsin             | R    | Exon 1 to Exon 2         | CGCCAGCTGTGAACGGATACT    | CCAATACCAATGGTCCAGGT       |

\*Primers used to detect variants V1-V5

Oligo Type: S=sequencing amplification of genomic DNA, J=amplification spanning the 5' junction fragment, R=RT-PCR amplification from RNA
